# Supplementary material for: NMR characterisation of unstable solvent and dihydride complexes generated at low temperature by in-situ UV irradiation
Source: Royal Society of Chemistry journal article supplement (doi:10.1039/b208007a), 2002-01-01
Supplement: b208007a.doc [file b208007a.doc]

NMR characterisation of unstable solvent and dihydride complexes generated at low temperature by *in-situ* UV irradiation

**Cyril Godarda, Philip Callaghana, Jenny L. Cunninghama,****Simon B. Ducketta*, Joost A. B. Lohmanb and Robin N. Perutza**

**a***Department of Chemistry, University of York, Heslington, York, UK YO10 5DD*

*E-mail:* [sbd3@york.ac.uk](mailto:sbd3@york.ac.uk)

**b***Bruker BioSpin, Banner Lane, Coventry, UK CV4 9GH*

Supplementary Information.

Scheme 1

NMR Data for (5-C5H5)Rh(C2H3SiMe3)2 **1c**: Structures shown in Scheme 1 above.

*cis-up-up-***1c*:*** 1H (203 K)  0.21 (Me),  0.76 (m, C(HU)(HD)=CH(D)SiMe3),  1.63 (d 10.2 Hz, CHU(HD)=CHU(HD)SiMe3),  2.97 (d 13.7 Hz, CHU(HD)=CH(D)SiMe3),  4.95 (s, 5H, Cp); 103Rh  –822;

*trans-up-up-***1c:** 1H (203 K)  –0.30 (m, C(HU)(HD)=CH(D)SiMe3),  0.27 (Me),  2.32 (d 10.15 Hz, CHU(HD)=CH(D)SiMe3),  2.86 (d 13.33 Hz, CHU(HD)=CH(D)SiMe3),  4.92 (s, 5H, Cp); 103Rh  –868;

*trans-up-down-***1c**: 1H (203 K)  0.24 (Me),  1.77 (d 13.7 Hz, CHU(HD)=CH(D)SiMe3),  2.2 (m, C(HU)(HD)=CH(D)SiMe3),  3.51 (d 10.8 Hz, CHU(HD)=CH(D)SiMe3); 0.28 (Me),  0.79 (m, C(HU)(HD)=CH(U)SiMe3),  2.43 (d 11 Hz, CHU(HD)=CH(D)SiMe3),  2.78 (d 14 Hz, CHU(HD)=CH(D)SiMe3),  4.77 (s, 5H, Cp), 103Rh  –668;

*cis-up-down-***1c**, minor isomer, 1H (203 K) vinyl 1H signals:  0.87, 0.99, 2.24, 3.04, 3.66,  4.79 (s, 5H, Cp); 103Rh  –728.

Scheme 2

NMR Data for [(5-C5H5)Rh(C2H3SiMe3)](-H)2 **5**: Structures shown in Scheme 2 above.

**5a**.: 1H (203 K)  –­13.95 (td, JHH = 7Hz, JRhH = 21.2 Hz),  –13.03 (td, JHH = 7Hz, JRhH = 21.2 Hz), 0.240 SiMe3, 1.18 (m, C(HU)(HD)=CH(U)SiMe3),  1.97 (m, C(HU)(HD)=CH(U)SiMe3),  2.64 (m, C(HU)(HD)=CH(U)SiMe3),  4.89 (s, 5H, Cp) , 103Rh  –­955.

**5b**.: 1H (203 K)  –14.30 (t, JRhH = 19.8 Hz),  0.11 (m, C(HU)(HD)=CH(D)SiMe3),  0.17 SiMe3,  2.43 (m, C(HU)(HD)=CH(U)SiMe3),  2.59 (m, C(HU)(HD)=CH(U)SiMe3),  4.93 (s, 5H, Cp) , 103Rh  ­–1029.

**5c**. minor isomer, 1H (203 K) , –13.43 (t, JRhH = 20.5 Hz), 103Rh  –­973.

Experimental Set-up

We use a wide-bore 400 MHz NMR spectrometer and narrow bore NMR probe containing a hole in the ceramic housing. A laser beam is projected from the base of the magnet, through the air-gap between the probe and shim-stack on to the sample via a prism and mirror. This results in product generation in the high sensitivity detection region of the probe. Our arrangement also ensures that high-resolution spectra can be collected on pressurised samples at low temperature.
